# Supplementary material for: 140-year daily ensemble streamflow reconstructions over 661 catchments in France
Source: Copernicus journal article supplement (doi:10.5194/hess-2023-78), 2023-03-24
Supplement: Supplementary file [file hess-2023-78-RC2-supplement.pdf]

Minor corrections:

- In section 2.1, it would be better to put the two subsections in bold, which are not numbered, into only one section.
- I.94 catchment instead of "cathement"
- I.111 models instead of model
- I.159: "The year" instead of "Tear"
- I.172: the "to" is missing in "is used to define"
- I.262: space before However is missing
- I.290: Applying
- Section 3.5.1 : Missing the reference of Figure 2
- I.419 a space is missing
- I.434 "strong" instead of "stong"
- I.454 space at the end of the sentence
